# Supplementary material for: Diversity and habitat preferences of bdelloid rotifers in mosses and liverworts from beach forest along sand dunes in Thailand
Source: PeerJ. 2024 Dec 16;12:e18721. doi: 10.7717/peerj.18721 (PMC11657207; doi:10.7717/peerj.18721)
Supplement: Supplemental Information 1 [file peerj-12-18721-s001.xlsx]

## Sheet: Supplementary table1
Supplementary table 1 Bryophyte species found in the present study but were excluded from the analysis
Bryophyte species	Rainfall
Liverworts
Acrolejeunea pycnoclada	High
Acrolejeunea parvula	Low, High
Caudalejeunea reniloba	Moderate
Cololejeunea subg. Aphanolejeunea	Low, High
Cololejeunea inflectens	High
Drepanolejeunea erecta	Moderate
Drepanolejeunea vesiculosa	High
Frullania berthoumieui	Moderate, High
Frullania brotheri	Moderate
Frullania campanulata	Low, Moderate
Frullania gracilis	Moderate
Frullania parvistipula	High
Lejeunea tuberculosa	Low, Moderate, High
Lopholejeunea horticola	High
Lopholejeunea nigricans	Moderate
Lopholejeunea subfusca	Low, Moderate, High
Thysananthus auriculatus	Moderate, High
Thysananthus indicus	Low, Moderate, High
Thysananthus ligulatus	High
Thysananthus repletus	Low
Spruceanthus planiusculus	Moderate
Mosses
Calymperes motleyi	Moderate, High
Ectropothecium zollingeri	High
Leucophanes octoblepharioides	Moderate
Mitthyridium repens	High
Syrrhopodon fimbriatulus	High

## Sheet: Supplementary table 2
Supplementary table 2 Jaccard similarity Index between mosses and liverworts. Bold number indicated the highest value.
	Mosses	Liverworts
Mosses
Liverworts	0.41

## Sheet: Supplementary table 3
Supplementary table 3 Jaccard similarity Index of each bryophyte species. Bold number indicated the highest value.
	Acrolejeunea recurvata	Brachymenium sp.	Calymperes erosum	Calymperes tenerum	Cheilolejeunea ceylanica	Cheilolejeunea cf. intertexa	Cololejeunea planissima	Frullania ericoides	Lejeunea adpressa	Lejeunea cocoes	Microlejeunea punctiformis	Octoblepharum benitotanii	Octoblepharum poscii	Schiffneriolejeunea cumingiana	Schiffneriolejeunea tumida var. haskarliana	Taxithelium instratum
Acrolejeunea recurvata
Brachymenium sp.	0.666667
Calymperes erosum	0	0
Calymperes tenerum	0.166667	0.142857	0.285714
Cheilolejeunea ceylanica	0.166667	0.142857	0.125	0.25
Cheilolejeunea cf. intertexa	0.2	0.166667	0.142857	0.285714	0.285714
Cololejeunea planissima	0.125	0.25	0.375	0.333333	0.333333	0.222222
Frullania ericoides	0.25	0.2	0.4	0.333333	0.333333	0.166667	0.428571
Lejeunea adpressa	0.25	0.375	0.333333	0.3	0.3	0.2	0.666667	0.375
Lejeunea cocoes	0.25	0.5	0.166667	0.333333	0.333333	0.166667	0.428571	0.5	0.375
Microlejeunea punctiformis	0.125	0.111111	0.375	0.333333	0.5	0.222222	0.555556	0.428571	0.5	0.25
Octoblepharum benitotanii	0	0	0.6	0.285714	0.125	0.142857	0.375	0.4	0.333333	0.166667	0.375
Octoblepharum poscii	0.333333	0.25	0.2	0.4	0.4	0.2	0.285714	0.666667	0.25	0.666667	0.285714	0.2
Schiffneriolejeunea cumingiana	0.5	0.333333	0	0.2	0.2	0.25	0.142857	0.333333	0.125	0.333333	0.142857	0	0.5
Schiffneriolejeunea tumida var. haskarliana	0	0	0.333333	0.3	0.3	0.0909091	0.5	0.222222	0.454545	0.1	0.5	0.333333	0.111111	0
Taxithelium instratum	0.25	0.2	0.4	0.333333	0.333333	0.166667	0.428571	1	0.375	0.5	0.428571	0.4	0.666667	0.1	0.222222

## Sheet: Supplementary table 4
Supplementary table 4 Jaccard similarity Index of life forms. Bold number indicated the highest value.
	Cushion	Mat	Turf
Cushion
Mat	0.21
Turf	0.1	0.29

## Sheet: Supplementary table 5
Supplementary table 5 Jaccard similarity Index of seasons. Bold number indicated the highest value.
	Low rainfall	Moderate rainfall	High rainfall
Low rainfall
Moderate rainfall	0.47
High rainfall	0.44	0.55

## Sheet: Supplementary table 6
Supplementary table 6 Jaccard similarity Index of character of bryophytes. Bold number indicated the highest value.
	Leaves curl when dry	Leaves do not curl when dry	Large lobule	Small lobule
Leaves curl when dry
Leaves do not curl when dry	0.4
Large lobule	0.44	0.27
Small lobule	0.55	0.44	0.57

## Sheet: Supplementary table 7
52	samples
17	species
	Q	Q	Q	Q	Q	Q	Q	Q	Q	Q	Q	Q	Q	Q	Q	Q	Q
	Adineta cf. glauca	Adineta sp.1	Didymodactylos sp.	Habrotrocha angusticollis	Habrotrocha cf. alacris	Habrotrocha bidens	Habrotrocha flaviformis	Habrotrocha gracilis	Habrotrocha sp.	Macrotrachela multispinosa	Macrotrachela papillosa	Macrotrachela pinnigera	Macrotrachela sp.	Philodina verrucosa	Pleuretra sp.	Rotaria sordida	Scepanotrocha simplex	Total	Bryophytes species	Bryophyte groups	Life forms	Characters	Seasons
Bryophyte samples
A1	0	1	0	0	0	4	0	0	0	0	0	0	0	0	0	1	0	6	Calymperes tenerum	Moss	Turf	Leave curl when dry	Low
A2	0	0	0	0	0	6	0	0	0	0	0	0	0	0	0	0	0	6	Cheilolejeunea cf. intertexa	Liverwoth	Mat	Large lobule	Low
A4	1	0	0	0	0	0	0	9	0	0	0	0	0	0	0	0	0	10	Cheilolejeunea cf. intertexa	Liverwoth	Mat	Large lobule	Low
A8	0	0	0	0	0	0	0	0	0	12	0	0	0	0	0	3	0	15	Calymperes tenerum	Moss	Turf	Leave curl when dry	Low
A9	0	0	0	3	1	7	2	0	0	8	0	0	0	1	0	0	4	26	Schiffneriolejeunea tumida var. haskarliana	Liverwoth	Mat	Large lobule	Low
A10	0	0	0	0	0	2	1	0	0	2	0	0	0	0	4	1	0	10	Lejeunea adpressa	Liverwoth	Mat	Small lobule	Low
A11	0	0	0	0	0	0	0	0	0	0	1	0	0	0	0	3	1	5	Microlejeunea punctiformis	Liverwoth	Mat	Large lobule	Low
A12	0	0	0	0	0	0	0	1	0	1	1	0	0	0	0	2	3	8	Cheilolejeunea ceylanica	Liverwoth	Mat	Large lobule	Low
A16	0	0	0	0	0	0	0	0	0	0	0	0	0	0	0	5	0	5	Schiffneriolejeunea cumingiana	Liverwoth	Mat	Small lobule	Low
A17	0	0	0	0	0	0	0	0	0	1	0	0	0	0	0	0	0	1	Microlejeunea punctiformis	Liverwoth	Mat	Large lobule	Low
A20	0	0	0	0	0	0	0	0	0	1	2	0	0	0	0	4	0	7	Microlejeunea punctiformis	Liverwoth	Mat	Large lobule	Low
A22	0	0	0	0	0	0	0	0	0	0	0	0	0	0	0	10	0	10	Calymperes tenerum	Moss	Turf	Leave curl when dry	Low
A31	0	0	0	0	0	0	0	0	0	0	0	1	0	0	0	9	0	10	Acrolejeunea recurvata	Liverwoth	Mat	Large lobule	Low
A32	0	0	0	0	0	0	0	0	0	0	0	0	0	0	0	16	0	16	Lejeunea adpressa	Liverwoth	Mat	Small lobule	Low
A33	0	0	0	0	0	0	0	0	0	0	0	0	0	0	0	4	0	4	Lejeunea adpressa	Liverwoth	Mat	Small lobule	Low
A38	0	0	0	0	0	0	1	0	0	12	0	0	0	0	1	0	0	14	Cololejeunea planissima	Liverwoth	Mat	Large lobule	Low
A43	0	0	0	0	0	0	0	0	0	1	0	0	0	1	0	2	0	4	Calymperes tenerum	Moss	Turf	Leave curl when dry	Low
A47	0	0	0	0	0	0	0	0	0	0	0	0	0	0	0	1	0	1	Cheilolejeunea cf. intertexa	Liverwoth	Mat	Large lobule	Low
Au53	0	0	0	2	0	1	0	0	0	0	0	0	2	0	0	0	0	5	Octoblepharum benitotanii	Moss	Turf	Leave do not curl when dry	Mid
Au60	0	0	0	2	0	0	0	0	0	1	0	0	0	0	0	0	0	3	Octoblepharum benitotanii	Moss	Turf	Leave do not curl when dry	Mid
Au62	0	0	0	0	0	0	0	0	0	0	0	0	0	0	0	1	0	1	Calymperes tenerum	Moss	Turf	Leave curl when dry	Mid
Au65	0	0	0	0	0	0	0	0	0	2	0	0	0	0	0	3	0	5	Frullania ericoides	Liverwoth	Mat	Large lobule	Mid
Au68	0	0	0	2	0	0	0	0	0	0	0	0	0	0	0	6	0	8	Frullania ericoides	Liverwoth	Mat	Large lobule	Mid
Au69	0	0	0	0	0	0	0	0	0	5	0	0	0	0	0	1	0	6	Octoblepharum poscii	Moss	Turf	Leave do not curl when dry	Mid
Au71	0	0	0	0	0	0	0	0	0	0	0	0	0	0	0	5	0	5	Taxithelium instratum	Moss	Mat	Leave do not curl when dry	Mid
Au93	0	0	0	1	0	0	0	0	0	0	0	55	0	0	0	0	0	56	Lejeunea adpressa	Liverwoth	Mat	Small lobule	Mid
Au101	0	0	0	0	0	0	0	0	0	0	1	0	0	0	16	9	0	26	Cololejeunea planissima	Liverwoth	Mat	Large lobule	Mid
Au105	0	0	0	0	0	0	0	0	0	0	0	0	0	0	0	2	0	2	Calymperes tenerum	Moss	Turf	Leave curl when dry	Mid
Au107	0	0	0	3	0	0	0	0	0	0	0	0	0	0	0	1	0	4	Cololejeunea planissima	Liverwoth	Mat	Large lobule	Mid
Au111	0	0	0	2	0	0	0	0	0	0	0	0	0	0	0	0	0	2	Calymperes erosum	Moss	Turf	Leave curl when dry	Mid
Au112	0	0	0	0	0	0	0	0	0	1	0	0	0	0	0	0	0	1	Taxithelium instratum	Moss	Mat	Leave do not curl when dry	Mid
Au114	0	0	0	0	0	0	0	0	0	0	0	3	0	0	0	0	0	3	Brachymenium sp.	Moss	Cushion	Leave curl when dry	Mid
Au115	0	0	0	0	0	0	0	0	0	1	0	0	0	0	0	0	0	1	Microlejeunea punctiformis	Liverwoth	Mat	Large lobule	Mid
Au116	0	0	0	0	0	0	0	0	0	0	0	0	0	0	2	3	0	5	Brachymenium sp.	Moss	Cushion	Leave curl when dry	Mid
Au117	0	0	0	0	0	0	0	0	0	1	0	0	0	0	0	5	0	6	Calymperes tenerum	Moss	Turf	Leave curl when dry	Mid
De122	0	0	0	4	0	1	0	0	2	1	0	0	0	0	0	0	0	8	Calymperes erosum	Moss	Turf	Leave curl when dry	High
De128	0	0	0	0	0	1	0	0	0	1	0	0	0	0	0	0	0	2	Cololejeunea planissima	Liverwoth	Mat	Large lobule	High
De133	0	0	0	1	0	0	0	0	0	0	0	0	0	0	0	0	0	1	Cololejeunea planissima	Liverwoth	Mat	Large lobule	High
De140	0	0	0	11	0	0	0	0	0	0	0	0	0	0	0	0	0	11	Octoblepharum benitotanii	Moss	Turf	Leave do not curl when dry	High
De142	0	0	0	0	0	2	0	0	0	1	0	0	0	0	0	0	0	3	Lejeunea adpressa	Liverwoth	Mat	Small lobule	High
De143	0	0	0	0	0	0	0	0	0	1	0	0	0	0	0	0	0	1	Microlejeunea punctiformis	Liverwoth	Mat	Large lobule	High
De146	0	0	0	1	0	2	0	0	0	0	0	0	0	0	0	2	29	34	Lejeunea adpressa	Liverwoth	Mat	Small lobule	High
De147	0	0	1	2	0	6	0	0	0	0	0	0	0	0	0	0	6	15	Microlejeunea punctiformis	Liverwoth	Mat	Large lobule	High
De159	0	0	0	0	0	0	0	0	0	4	0	0	0	0	0	0	0	4	Taxithelium instratum	Moss	Mat	Leave do not curl when dry	High
De160	0	0	0	11	0	0	0	0	0	6	0	0	0	0	0	0	0	17	Calymperes erosum	Moss	Turf	Leave curl when dry	High
De161	0	0	0	0	0	0	0	0	0	0	0	0	0	0	2	0	0	2	Lejeunea cocoes	Liverwoth	Mat	Small lobule	High
De162	0	0	0	1	0	0	0	0	0	8	0	0	0	0	0	0	0	9	Taxithelium instratum	Moss	Mat	Leave do not curl when dry	High
De165	0	0	0	0	0	0	0	0	0	0	0	0	0	0	0	1	0	1	Taxithelium instratum	Moss	Mat	Leave do not curl when dry	High
De173	0	0	0	0	0	0	0	0	0	0	2	0	0	0	0	0	0	2	Schiffneriolejeunea tumida var. haskarliana	Liverwoth	Mat	Large lobule	High
De177	0	0	0	0	0	0	0	0	0	2	0	0	0	0	0	0	0	2	Taxithelium instratum	Moss	Mat	Leave do not curl when dry	High
De180	0	0	0	0	0	0	0	0	0	0	0	0	0	0	0	1	0	1	Microlejeunea punctiformis	Liverwoth	Mat	Large lobule	High
De182	0	0	0	0	0	0	0	0	0	1	0	0	0	0	0	1	0	2	Lejeunea cocoes	Liverwoth	Mat	Small lobule	High

## Sheet: Supplementary table 8
Supplementary table 8 Density of bdelloid rotifers in each bryophyte species
Bdelloid rotifer species	Mosses (individuals/10 cm²)						Liverworts ( (individuals/10 cm²)
	Brachymenium sp.	Calymperes erosum	Calymperes tenerum	Octoblepharum benitotanii	Octoblepharum poscii	Taxithelium instratum	Cheilolejeunea ceylanica	Acrolejeunea recurvata	Cheilolejeunea cf. intertexa	Cololejeunea planissima	Frullania ericoides	Lejeunea adpressa	Lejeunea cocoes	Microlejeunea punctiformis	Schiffneriolejeunea cumingiana	Schiffneriolejeunea tumida var. haskarliana
Adineta cf. glauca	0	0	0	0	0	0	0	0	3.33333	0	0	0	0	0	0	0
Adineta sp.1	0	0	2.38095	0	0	0	0	0	0	0	0	0	0	0	0	0
Didymodactylos sp.	0	0	0	0	0	0	0	0	0	0	0	0	0	0.952857	0	0
Habrotrocha angusticollis	0	71.57	0	68.89	0	1.85167	0	0	0	35	12.5	0.788529	0	1.90429	0	5.77
Habrotrocha cf. alacris	0	0	0	0	0	0	0	0	0	0	0	0	0	0	0	1.925
Habrotrocha bidens	0	4.16667	9.52381	6.66667	0	0	0	0	33.3333	10	0	15.4254	0	5.71429	0	13.46
Habrotrocha flaviformis	0	0	0	0	0	0	0	0	0	1.42857	0	1.66667	0	0	0	3.845
Habrotrocha gracilis	0	0	0	0	0	0	12.5	0	30	0	0	0	0	0	0	0
Habrotrocha sp.	0	8.33333	0	0	0	0	0	0	0	0	0	0	0	0	0	0
Macrotrachela multispinosa	0	15.93	17.3814	11.11	83.33	64.815	12.5	0	0	27.1429	20	8.88833	25	44.8986	0	15.385
Macrotrachela papillosa	0	0	0	0	0	0	12.5	0	0	0.769231	0	0	0	6.93857	0	50
Macrotrachela pinnigera	50	0	0	0	0	0	0	10	0	0	0	16.3683	0	0	0	0
Macrotrachela sp.	0	0	0	13.3333	0	0	0	0	0	0	0	0	0	0	0	0
Philodina verrucosa	0	0	3.57143	0	0	0	0	0	0	0	0	0	0	0	0	1.925
Pleuretra sp.	20	0	0	0	0	0	0	0	0	13.7363	0	6.66667	50	0	0	0
Rotaria sordida	30	0	67.1424	0	16.67	33.3333	25	90	33.3333	11.9231	67.5	35.9804	25	31.02	100	0
Scepanotrocha simplex	0	0	0	0	0	0	37.5	0	0	0	0	14.2157	0	8.57143	0	7.69
